# Supplementary material for: Epidemiology of Nocardia Species at a Tertiary Hospital in Southern Taiwan, 2012 to 2020: MLSA Phylogeny and Antimicrobial Susceptibility
Source: MDPI journal article supplement (doi:10.3390/antibiotics11101438), 2022-10-19
Supplement: s1 [file s1]

Supplementary File

**Table S1.** Accession number for four genes of these 12 type strains of *Nocardia* species as an indicator from GenBank.

| No. | Species                           | Strains                  | 16S rRNA  | <i>gryB</i> | <i>hsp65</i> | <i>secA1</i> |
|-----|-----------------------------------|--------------------------|-----------|-------------|--------------|--------------|
| 1   | <i>Nocardia brasiliensis</i>      | ATCC 700358 <sup>T</sup> | AY245543  | GQ496125    | CP003876     | AY781799     |
| 2   | <i>Nocardia cyriacigeorgica</i>   | DSM 43005 <sup>T</sup>   | AF430020  | GQ496121    | EF127506     | GU179101     |
| 3   | <i>Nocardia farcinica</i>         | DSM 43665 <sup>T</sup>   | OK103762  | GQ496115    | KF432742     | GU179106     |
| 4   | <i>Nocardia niigatensis</i>       | DSM 44670 <sup>T</sup>   | AY903615  | GQ496135    | AY903629     | DQ360278     |
| 5   | <i>Nocardia asteroides</i>        | ATCC 19247 <sup>T</sup>  | AY756541  | GQ496120    | AY756513     | CP089227     |
| 6   | <i>Nocardia beijingensis</i>      | JCM 10666 <sup>T</sup>   | NR_115827 | GQ496127    | KF420485     | DQ360268     |
| 7   | <i>Nocardia otitidiscaviarum</i>  | DSM 43242 <sup>T</sup>   | NR_041874 | GQ496100    | AY756528     | CP041695     |
| 8   | <i>Nocardia crassostreae</i>      | ATCC 700418 <sup>T</sup> | AY756548  | AB450779    | AY756520     | DQ360280     |
| 9   | <i>Nocardia asiatica</i>          | DSM 44668 <sup>T</sup>   | AY903617  | AB450770    | AY903631     | JQ773453     |
| 10  | <i>Nocardia amikacinitolerans</i> | AEH_16681 <sup>T</sup>   | MK696294  | HM444068    | MK886466     | MK876008     |
| 11  | <i>Nocardia concava</i>           | DSM 44804 <sup>T</sup>   | NR_115958 | GQ496122    | AB427103     | EU178746     |
| 12  | <i>Nocardia cerradoensis</i>      | DSM 44546 <sup>T</sup>   | AY756547  | GQ496123    | AY756519     | KT749662     |

**Table S2.** Housekeeping genes primer.

| Primer name           | Sequence               | Target gene  | Amplicon size (bp) | PCR cycling conditions                                             |
|-----------------------|------------------------|--------------|--------------------|--------------------------------------------------------------------|
| <i>Nocardia</i> -E8F  | AGAGTTT-GATCCTGGCTCAG  | 16S rRNA     | 499                | 98°C 30s, 35 cycle, 98°C 5s, 56°C 5s, 72°C 20s, 1 cycle 72°C 1min  |
| <i>Nocardia</i> -534r | ATTACCGCGGCTGCTGG      |              |                    |                                                                    |
| <i>secA1</i> -F47     | GCGACGCCGAGTGGATGG     | <i>secA1</i> | 521                | 98°C 30s, 35 cycle, 98°C 5s, 63°C 5s, 72°C 20s, 1 cycle 72°C 1min  |
| <i>secA1</i> -ConR    | GCGGACGATGTAGTCCTT-GTC |              |                    |                                                                    |
| <i>gyrB</i> -F        | CTTCGCCAACAC-CATCAACAC | <i>gyrB</i>  | 611                | 98°C 30s, 35 cycle, 98°C 5s, 60°C 5s, 72°C 20s, 1 cycle, 72°C 1min |
| <i>gyrB</i> -R        | TGATGATCGACTGGAC-CTCG  |              |                    |                                                                    |
| <i>hsp65</i> -F       | ACCAAC-GATGGTGTGTCCAT  | <i>hsp65</i> | 441                | 98°C 30s, 35 cycle, 98°C 5s, 54°C 5s, 72°C 20s, 1 cycle, 72°C 1min |
| <i>hsp65</i> -R       | CTTGTCGAACCGCATACCCT   |              |                    |                                                                    |

[32]
